# Supplementary material for: Associations of metal mixtures with metabolic-associated fatty liver disease and non-alcoholic fatty liver disease: NHANES 2003–2018
Source: PubMed Central journal article supplement (PMC10025549; doi:10.3389/fpubh.2023.1133194), 2023-03-06
Supplement: Data_Sheet_1.pdf [file Data_Sheet_1.pdf]

## Supplementary Material

### Associations of metal mixtures with metabolic-associated fatty liver disease and nonalcoholic fatty liver disease: NHANES 2003-2018

Zhilan Xie<sup>1†</sup>, Ruxianguli Aimuzi<sup>1†</sup>, Mingyu Si<sup>1</sup>, Yimin Qu<sup>1\*</sup>, Yu Jiang<sup>1\*</sup>

<sup>1</sup>School of Population Medicine and Public Health, Chinese Academy of Medical Sciences and Peking Union Medical College, Beijing, 100730, China

\* **Correspondence:** Dr. Yu Jiang, School of Population Medicine and Public Health, Chinese Academy of Medical Sciences and Peking Union Medical College; E-mail address: jiangyu@pumc.edu.cn; or Dr. Yimin, Qu, School of Population Medicine and Public Health, Chinese Academy of Medical Sciences and Peking Union Medical College; E-mail address: quyimin@sph.pumc.edu.cn.

<sup>†</sup>These authors contributed equally to this work

#### 1 Supplementary for assessment of outcome

We used USFLI, a well-validated steatosis score, to define hepatic steatosis as a substitute for the liver biopsy (1, 2). The score incorporates age, race/ethnicity, waist circumference, gamma-glutamyltransferase (GGT), fasting insulin, and fasting glucose. The formula of USFLI is as follows:

$$\text{USFLI} = \frac{e^{-0.8073 * \text{non-Hispanic black} + 0.3458 * \text{Mexican American} + 0.0093 * \text{age} + 0.6151 * \log_e(\text{GGT}) + 0.0249 * \text{waist circumference} + 1.1792 * \log_e(\text{insulin}) + 0.8242 * \log_e(\text{glucose}) - 14.7812}}{(1 + e^{-0.8073 * \text{non-Hispanic black} + 0.3458 * \text{Mexican American} + 0.0093 * \text{age} + 0.6151 * \log_e(\text{GGT}) + 0.0249 * \text{waist circumference} + 1.1792 * \log_e(\text{insulin}) + 0.8242 * \log_e(\text{glucose}) - 14.7812})} * 100$$

Hepatic steatosis was defined to be present in the USFLI score greater than or equal to 30 (2). This cut-off point has been previously validated with a sensitivity and specificity of 62% and 88%, respectively (3).

MAFLD was defined by presence of hepatic steatosis, demonstrated by serologic score (USFLI  $\geq 30$ ), with at least one of the MAFLD components (4): overweight/obesity (body mass index (BMI)  $\geq 25$  kg/m<sup>2</sup>), diabetes mellitus (fasting glucose levels  $\geq 7$  mmol/L, or hemoglobin A1c (HbA1c)  $\geq 6.5\%$ , or 2-h post-load plasma glucose levels (2h-OGTT)  $\geq 11$  mmol/L), and metabolic dysfunction (at least two metabolic risk abnormalities). Metabolic abnormalities included (5): (a) central obesity (waist circumference  $\geq 102$ cm in men and  $\geq 88$ cm in women) (b) hypertension (blood pressure  $\geq 130/85$  mmHg or prescription for hypertension); (c) High triglyceride (TG) (TG  $\geq 150$  mg/dL); (d) Low high-density lipoprotein (HDL) cholesterol (HDL  $< 40/50$  mg/dL in men and women); (e) Prediabetes (fasting glucose levels 5.6 to 6.9 mmol/L, or 2h-OGTT 7.8 to 11 mmol/L, or HbA1c 5.7% to 6.4%); (f) Insulin resistance (homeostasis model assessment of insulin resistance score (HOMA-IR)  $\geq 2.5$ ); (g) high C-reactive protein (CRP) (CRP level  $> 2$  mg/L). NAFLD was defined as the USFLI  $\geq 30$ , in the absence of viral hepatitis (HBV or HCV) and excessive consumption history of alcohol (alcohol consumption  $\geq 30/20$  g/d for men and women) (1).

## Reference

1. European Association for the Study of the Liver (EASL); European Association for the Study of Diabetes (EASD); European Association for the Study of Obesity (EASO). EASL-EASD-EASO Clinical Practice Guidelines for the management of non-alcoholic fatty liver disease. *J Hepatol.* 2016 Jun;64(6):1388-402. doi: 10.1016/j.jhep.2015.11.004.
2. Ruhl CE, Everhart JE. Fatty liver indices in the multiethnic United States National Health and Nutrition Examination Survey. *Aliment Pharmacol Ther.* 2015 Jan;41(1):65-76. doi: 10.1111/apt.13012.
3. Barb D, Repetto EM, Stokes ME, Shankar SS, Cusi K. Type 2 diabetes mellitus increases the risk of hepatic fibrosis in individuals with obesity and nonalcoholic fatty liver disease. *Obesity (Silver Spring).* 2021 Nov;29(11):1950-1960. doi: 10.1002/oby.23263.
4. Eslam M, Newsome PN, Sarin SK, Anstee QM, Targher G, Romero-Gomez M, et al. A new definition for metabolic dysfunction-associated fatty liver disease: An international expert consensus statement. *J Hepatol.* 2020 Jul;73(1):202-209. doi: 10.1016/j.jhep.2020.03.039.
5. Chalasani N, Younossi Z, Lavine JE, Charlton M, Cusi K, Rinella M, et al. The diagnosis and management of nonalcoholic fatty liver disease: Practice guidance from the American Association for the Study of Liver Diseases. *Hepatology.* 2018 Jan;67(1):328-357. doi: 10.1002/hep.29367

**Supplementary Figures and Tables**
**Supplementary table 1.** Detection methods of heavy metal concentrations in urine, NHANES 2003-2018.

| Metal   | 2003-2004                                                        | 2005-2006  | 2007-2008  | 2009-2010  | 2011-2012  | 2013-2014  | 2015-2016  | 2017-2018  |
|---------|------------------------------------------------------------------|------------|------------|------------|------------|------------|------------|------------|
| As      | ICP-DRC-MS                                                       | ICP-DRC-MS | ICP-DRC-MS | ICP-DRC-MS | ICP-DRC-MS | ICP-DRC-MS | ICP-DRC-MS | ICP-DRC-MS |
| Asb     | HPLC                                                             | HPLC       | HPLC       | HPLC       | HPLC       | HPLC       | HPLC       | HPLC       |
| DMA     | HPLC                                                             | HPLC       | HPLC       | HPLC       | HPLC       | HPLC       | HPLC       | HPLC       |
| MM<br>A | HPLC                                                             | HPLC       | HPLC       | HPLC       | HPLC       | HPLC       | HPLC       | HPLC       |
| Ba      | ICP-MS                                                           | ICP-MS     | ICP-MS     | ICP-MS     | ICP-MS     | ICP-MS     | ICP-DRC-MS | ICP-DRC-MS |
| Cd      | ICP-MS                                                           | ICP-MS     | ICP-MS     | ICP-MS     | ICP-MS     | ICP-MS     | ICP-DRC-MS | ICP-DRC-MS |
| Co      | ICP-MS                                                           | ICP-MS     | ICP-MS     | ICP-MS     | ICP-MS     | ICP-MS     | ICP-DRC-MS | ICP-DRC-MS |
| Cs      | ICP-MS                                                           | ICP-MS     | ICP-MS     | ICP-MS     | ICP-MS     | ICP-MS     | ICP-DRC-MS | ICP-DRC-MS |
| Hg      | Flow injection<br>cold vapor<br>atomic<br>absorption<br>analysis | ICP-DRC-MS | ICP-DRC-MS | ICP-DRC-MS | ICP-DRC-MS | ICP-DRC-MS | ICP-DRC-MS | ICP-DRC-MS |
| Mo      | ICP-MS                                                           | ICP-MS     | ICP-MS     | ICP-MS     | ICP-MS     | ICP-MS     | ICP-DRC-MS | ICP-DRC-MS |
| Pb      | ICP-MS                                                           | ICP-MS     | ICP-MS     | ICP-MS     | ICP-MS     | ICP-MS     | ICP-DRC-MS | ICP-DRC-MS |
| Sb      | ICP-MS                                                           | ICP-MS     | ICP-MS     | ICP-MS     | ICP-MS     | ICP-MS     | ICP-DRC-MS | ICP-DRC-MS |
| Tl      | ICP-MS                                                           | ICP-MS     | ICP-MS     | ICP-MS     | ICP-MS     | ICP-MS     | ICP-DRC-MS | ICP-DRC-MS |
| W       | ICP-MS                                                           | ICP-MS     | ICP-MS     | ICP-MS     | ICP-MS     | ICP-MS     | ICP-DRC-MS | ICP-DRC-MS |

Abbreviations: ICP-DRC-MS, inductively coupled-plasma dynamic reaction cell-mass spectrometry; ICP-MS, inductively coupled plasma-mass spectrometry; HPLC, high-performance liquid chromatography.

**Supplementary Table 2.** Detection frequency of urinary metal by survey cycles among adults in NHANES 2003-2018

| Metal | 2003-2004     |              | 2005-2006     |              | 2007-2008     |              | 2009-2010     |              | 2011-2012     |              | 2013-2014     |              | 2015-2016     |              | 2017-2018     |              | 2003-2018    |
|-------|---------------|--------------|---------------|--------------|---------------|--------------|---------------|--------------|---------------|--------------|---------------|--------------|---------------|--------------|---------------|--------------|--------------|
|       | LOD<br>(ug/L) | n(%)<br>>LOD | LOD<br>(ug/L) | n(%)<br>>LOD | LOD<br>(ug/L) | n(%)<br>>LOD | LOD<br>(ug/L) | n(%)<br>>LOD | LOD<br>(ug/L) | n(%)<br>>LOD | LOD<br>(ug/L) | n(%)<br>>LOD | LOD<br>(ug/L) | n(%)<br>>LOD | LOD<br>(ug/L) | n(%)<br>>LOD | n(%)<br>>LOD |
| As    | 0.6           | 635 (98.4)   | 0.74          | 627 (98.4)   | 0.74          | 737 (98.7)   | 0.74          | 798 (99.2)   | 1.25          | 649 (97.0)   | 0.26          | 714 (99.1)   | 0.26          | 669 (99.2)   | 0.23          | 651 (99.6)   | 5480 (98.7)  |
| Asb   | 0.4           | 473 (73.3)   | 0.4           | 500 (78.4)   | 0.4           | 449 (60.1)   | 0.4           | 541 (67.2)   | 1.19          | 342 (51.1)   | 1.16          | 365 (50.6)   | 1.16          | 348 (51.6)   | 1.16          | 316 (48.3)   | 3334 (60.0)  |
| DMA   | 1.7           | 561 (86.9)   | 1.7           | 556 (87.2)   | 1.7           | 625 (83.7)   | 1.7           | 678 (84.3)   | 1.80          | 539 (80.5)   | 1.91          | 539 (74.8)   | 1.91          | 508 (75.3)   | 1.91          | 493 (75.4)   | 4499 (81.0)  |
| MMA   | 0.9           | 223 (34.5)   | 0.9           | 234 (36.7)   | 0.9           | 262 (35.1)   | 0.9           | 261 (32.4)   | 0.89          | 203 (30.3)   | 0.20          | 526 (73.0)   | 0.20          | 410 (60.8)   | 0.20          | 310 (47.4)   | 2429 (43.7)  |
| Ba    | 0.311         | 597 (92.5)   | 0.12          | 622 (97.6)   | 0.12          | 735 (98.5)   | 0.12          | 797 (99.1)   | 0.100         | 660 (98.6)   | 0.060         | 711 (98.7)   | 0.060         | 667 (98.9)   | 0.060         | 648 (99.2)   | 5437 (97.9)  |
| Cd    | 0.042         | 625 (96.8)   | 0.042         | 610 (95.7)   | 0.042         | 725 (97.1)   | 0.042         | 784 (97.5)   | 0.056         | 620 (92.6)   | 0.036         | 696 (95.2)   | 0.036         | 651 (96.5)   | 0.036         | 641 (98.1)   | 5342 (96.2)  |
| Co    | 0.085         | 609 (94.4)   | 0.041         | 630 (98.9)   | 0.041         | 740 (99.1)   | 0.041         | 796 (99.0)   | 0.048         | 663 (99.1)   | 0.023         | 714 (99.1)   | 0.023         | 668 (99.1)   | 0.023         | 652 (99.8)   | 5472 (98.6)  |
| Cs    | NA            | 640 (99.2)   | NA            | 632 (99.2)   | NA            | 742 (99.4)   | 0.066         | 799 (99.3)   | 0.120         | 665 (99.4)   | NA            | 714 (99.1)   | 0.086         | 668 (99.1)   | 0.086         | 652 (99.8)   | 5512 (99.3)  |
| Hg    | 0.141         | 548 (84.9)   | 0.085         | 610 (95.7)   | 0.085         | 654 (87.6)   | 0.085         | 772 (96.0)   | 0.057         | 647 (96.7)   | 0.127         | 569 (79.0)   | 0.127         | 441 (65.4)   | 0.127         | 371 (56.8)   | 3186 (57.4)  |
| Mo    | 1.499         | 638 (98.9)   | NA            | 632 (99.2)   | 0.919         | 741 (99.3)   | 0.920         | 799 (99.3)   | 0.990         | 665 (99.4)   | 0.800         | 714 (99.1)   | 0.800         | 669 (99.2)   | 0.80          | 652 (99.8)   | 5510 (99.3)  |
| Pb    | 0.099         | 545 (84.4)   | 0.099         | 616 (96.7)   | 0.099         | 729 (97.7)   | 0.100         | 787 (97.8)   | 0.080         | 641 (95.8)   | 0.030         | 711 (98.7)   | 0.030         | 666 (98.8)   | 0.03          | 651 (99.6)   | 5346 (96.3)  |
| Sb    | 0.028         | 356 (55.1)   | 0.032         | 526 (82.5)   | 0.033         | 566 (75.8)   | 0.032         | 591 (73.5)   | 0.041         | 374 (55.9)   | 0.022         | 538 (74.7)   | 0.022         | 540 (80.1)   | 0.022         | 527 (80.7)   | 4018 (72.4)  |
| Tl    | 0.016         | 635 (98.4)   | 0.016         | 632 (99.2)   | 0.016         | 738 (98.9)   | 0.009         | 797 (99.1)   | 0.020         | 664 (99.2)   | 0.018         | 708 (98.3)   | 0.018         | 669 (99.2)   | 0.018         | 650 (99.5)   | 5493 (99.0)  |
| W     | 0.014         | 492 (76.2)   | 0.021         | 569 (89.3)   | 0.021         | 663 (88.8)   | 0.021         | 714 (88.8)   | 0.026         | 544 (81.3)   | 0.018         | 554 (76.9)   | 0.018         | 565 (83.3)   | 0.018         | 561 (85.9)   | 4662 (84.0)  |

Abbreviations: LOD, limit of detection; NA, not applicable.

**Supplementary table 3.** Comparison of metabolic-associated fatty liver disease and nonalcoholic fatty liver disease diagnostic criteria.

|                                                                                                                                                                  | MAFLD | NAFLD |
|------------------------------------------------------------------------------------------------------------------------------------------------------------------|-------|-------|
| Identification of hepatic steatosis                                                                                                                              | Yes   | Yes   |
| Comorbidities with at least one of the metabolic disorders (overweight/obesity, diabetes mellitus, and metabolic dysfunction)                                    | Yes   | No    |
| Exclusion of participants with a competing etiology of secondary hepatic steatosis (Excessive alcohol consumption or positive hepatitis B and C viral infection) | No    | Yes   |

**Supplementary Table 4.** Distribution of urinary metals in the study population stratified by MAFLD and NAFLD, NHANES 2003-2018.

| Metal<br>( $\mu\text{g/L}$ ) | All participants  | Non-MAFLD         | MAFLD             | <i>P</i> value | Non-NAFLD         | NAFLD             | <i>P</i> value |
|------------------------------|-------------------|-------------------|-------------------|----------------|-------------------|-------------------|----------------|
|                              | Median (Q1, Q3)   | Median (Q1, Q3)   | Median (Q1, Q3)   |                | Median (Q1, Q3)   | Median (Q1, Q3)   |                |
| As                           | 7.87 (4.10, 17.2) | 7.77 (4.01, 17.3) | 8.07 (4.34, 17.1) | 0.208          | 7.46 (3.82, 16.4) | 7.66 (4.12, 16.2) | 0.390          |
| Asb                          | 1.27 (0.82, 6.53) | 1.30 (0.82, 6.58) | 1.22 (0.82, 6.33) | 0.747          | 1.20 (0.82, 6.48) | 1.13 (0.82, 5.97) | 0.576          |
| DMA                          | 3.69 (2.12, 6.41) | 3.59 (2.05, 6.30) | 3.90 (2.25, 6.67) | 0.007          | 3.50 (2.00, 6.16) | 3.70 (2.15, 6.38) | 0.039          |
| MMA                          | 0.64 (0.60, 0.99) | 0.64 (0.60, 1.03) | 0.64 (0.53, 0.84) | <0.001         | 0.64 (0.60, 1.01) | 0.64 (0.51, 0.76) | <0.001         |
| Ba                           | 1.14 (0.58, 2.11) | 1.10 (0.56, 2.04) | 1.24 (0.62, 2.32) | <0.001         | 1.09 (0.56, 2.03) | 1.22 (0.61, 2.34) | <0.001         |
| Cd                           | 0.29 (0.15, 0.53) | 0.28 (0.14, 0.52) | 0.31 (0.17, 0.54) | <0.001         | 0.28 (0.14, 0.52) | 0.31 (0.17, 0.54) | <0.001         |
| Co                           | 0.34 (0.22, 0.53) | 0.34 (0.21, 0.53) | 0.35 (0.23, 0.52) | 0.016          | 0.34 (0.21, 0.54) | 0.36 (0.24, 0.53) | 0.015          |
| Cs                           | 4.58 (2.84, 6.82) | 4.48 (2.79, 6.77) | 4.80 (2.99, 6.91) | 0.003          | 4.47 (2.76, 6.70) | 4.76 (3.01, 6.90) | 0.003          |
| Hg                           | 0.39 (0.17, 0.88) | 0.40 (0.18, 0.91) | 0.35 (0.16, 0.82) | <0.001         | 0.40 (0.18, 0.91) | 0.34 (0.15, 0.78) | <0.001         |
| Mo                           | 39.5 (22.0, 64.5) | 38.1 (21.2, 63.7) | 41.6 (24.1, 66.3) | <0.001         | 37.4 (20.9, 63.2) | 41.8 (24.4, 66.4) | <0.001         |
| Pb                           | 0.46 (0.25, 0.82) | 0.46 (0.24, 0.81) | 0.47 (0.27, 0.87) | 0.003          | 0.45 (0.23, 0.79) | 0.47 (0.27, 0.83) | 0.002          |
| Sb                           | 0.05 (0.03, 0.09) | 0.05 (0.03, 0.09) | 0.05 (0.03, 0.09) | 0.013          | 0.05 (0.03, 0.09) | 0.05 (0.03, 0.09) | 0.006          |
| Tl                           | 0.16 (0.10, 0.26) | 0.16 (0.10, 0.25) | 0.17 (0.10, 0.26) | 0.022          | 0.16 (0.10, 0.25) | 0.17 (0.10, 0.26) | 0.017          |
| W                            | 0.06 (0.03, 0.12) | 0.06 (0.03, 0.11) | 0.07 (0.04, 0.12) | <0.001         | 0.06 (0.03, 0.11) | 0.07 (0.04, 0.12) | <0.001         |

Significance *P*-value <0.05 from Mann-Whitney U test.

**Supplementary Table 5.** Association of the heavy metal concentrations with MAFLD and NAFLD risk by gender

| Metal        | Male<br>OR (95%CI)  | Female<br>OR (95%CI) | <i>P</i> <sub>int</sub> |
|--------------|---------------------|----------------------|-------------------------|
| <b>MAFLD</b> |                     |                      |                         |
| Asb          | 1.07 (1.02, 1.13) * | 0.99 (0.94, 1.05)    | 0.195                   |
| As           | 1.15 (1.06, 1.25) * | 1.03 (0.94, 1.12)    | 0.113                   |
| Ba           | 1.18 (1.07, 1.29) * | 1.26 (1.14, 1.39) *  | 0.852                   |
| Cd           | 1.09 (0.95, 1.25)   | 1.07 (0.93, 1.23)    | 0.197                   |
| Co           | 1.29 (1.11, 1.49) * | 1.18 (1.03, 1.35) *  | 0.428                   |
| Cs           | 1.33 (1.11, 1.61) * | 1.36 (1.12, 1.66) *  | 0.582                   |
| DMA          | 1.26 (1.11, 1.42) * | 1.08 (0.95, 1.23)    | 0.220                   |
| Hg           | 1.00 (0.92, 1.10)   | 0.89 (0.81, 0.98)*   | <0.001                  |
| Mo           | 1.35 (1.17, 1.56) * | 1.58 (1.34, 1.86) *  | 0.379                   |
| Pb           | 0.95 (0.84, 1.08)   | 1.07 (0.93, 1.23)    | 0.600                   |
| Sb           | 1.17 (1.04, 1.33) * | 1.18 (1.03, 1.36) *  | 0.788                   |
| Tl           | 1.38 (1.17, 1.62) * | 1.61 (1.36, 1.91) *  | 0.160                   |
| W            | 1.17 (1.05, 1.29) * | 1.30 (1.17, 1.44) *  | 0.256                   |
| <b>NAFLD</b> |                     |                      |                         |
| Asb          | 1.06 (1.00, 1.12)   | 0.97 (0.91, 1.03)    | 0.128                   |
| As           | 1.14 (1.04, 1.25) * | 1.01 (0.92, 1.11)    | 0.081                   |
| Ba           | 1.19 (1.08, 1.32) * | 1.25 (1.13, 1.39) *  | 0.646                   |
| Cd           | 1.07 (0.92, 1.25)   | 1.09 (0.94, 1.26)    | 0.079                   |
| Co           | 1.37 (1.16, 1.61) * | 1.13 (0.99, 1.30)    | 0.108                   |
| Cs           | 1.31 (1.07, 1.60) * | 1.32 (1.07, 1.62) *  | 0.736                   |
| DMA          | 1.23 (1.07, 1.40) * | 1.03 (0.89, 1.19)    | 0.190                   |
| Hg           | 0.97 (0.88, 1.07)   | 0.87 (0.80, 0.96)*   | 0.003                   |
| Mo           | 1.36 (1.16, 1.59) * | 1.69 (1.42, 2.01) *  | 0.249                   |
| Pb           | 0.92 (0.80, 1.06)   | 1.06 (0.92, 1.23)    | 0.277                   |
| Sb           | 1.16 (1.02, 1.32) * | 1.22 (1.05, 1.42) *  | 0.811                   |
| Tl           | 1.39 (1.16, 1.66) * | 1.54 (1.29, 1.84) *  | 0.310                   |
| W            | 1.16 (1.03, 1.29) * | 1.30 (1.17, 1.45) *  | 0.330                   |

Estimates were presented as odds ratio (OR) and 95% confidence intervals (CIs). Adjusts for age, race, research cycle, education level, smoking status, PIR, and physical activity. \* Refers to  $P < 0.05$ ;  $P$ -int:  $P$  for interaction between urinary metals (continuous) and gender. In subgroup analysis, gender was not adjusted. \* for  $P < 0.05$ .

**Supplementary Table 6.** Associations of urinary metals with MAFLD and NAFLD among adults

|              | Model 1             | Model 2             |
|--------------|---------------------|---------------------|
| <b>MAFLD</b> |                     |                     |
| Asb          | 1.03 (0.99, 1.07)   | 1.05 (1.00, 1.10) * |
| As           | 1.06 (1.01, 1.12)*  | 1.12 (1.04, 1.20) * |
| Ba           | 1.17 (1.10, 1.24) * | 1.24 (1.12, 1.37) * |
| Cd           | 1.03 (0.96, 1.10)   | 1.18 (1.04, 1.34) * |
| Co           | 1.11 (1.03, 1.20) * | 1.34 (1.18, 1.52) * |
| Cs           | 1.12 (1.02, 1.22) * | 1.37 (1.13, 1.67) * |
| DMA          | 1.10 (1.02, 1.19) * | 1.21 (1.09, 1.35) * |
| Hg           | 0.95 (0.90, 1.01)   | 0.95 (0.86, 1.04)   |
| Mo           | 1.19 (1.10, 1.28) * | 1.53 (1.33, 1.77) * |
| Pb           | 0.98 (0.91, 1.06)   | 0.98 (0.87, 1.11)   |
| Sb           | 1.12 (1.03, 1.21) * | 1.20 (1.08, 1.34) * |
| Tl           | 1.24 (1.13, 1.36) * | 1.44 (1.23, 1.68) * |
| W            | 1.16 (1.09, 1.24) * | 1.28 (1.16, 1.41) * |
| <b>NAFLD</b> |                     |                     |
| Asb          | 1.02 (0.98, 1.06)   | 1.03 (0.98, 1.08)   |
| As           | 1.05 (1.00, 1.12)   | 1.08 (1.00, 1.17)   |
| Ba           | 1.19 (1.11, 1.27) * | 1.23 (1.11, 1.37) * |
| Cd           | 1.04 (0.97, 1.13)   | 1.19 (1.04, 1.37) * |
| Co           | 1.13 (1.04, 1.22) * | 1.33 (1.16, 1.53) * |
| Cs           | 1.13 (1.03, 1.25) * | 1.32 (1.10, 1.60) * |
| DMA          | 1.09 (1.00, 1.18) * | 1.14 (1.02, 1.28) * |
| Hg           | 0.94 (0.88, 0.99) * | 0.93 (0.85, 1.02)   |
| Mo           | 1.23 (1.13, 1.33) * | 1.58 (1.34, 1.85) * |
| Pb           | 0.99 (0.91, 1.07)   | 0.96 (0.85, 1.08)   |
| Sb           | 1.15 (1.05, 1.25) * | 1.20 (1.05, 1.36) * |
| Tl           | 1.26 (1.14, 1.39) * | 1.44 (1.23, 1.69) * |
| W            | 1.17 (1.10, 1.25) * | 1.28 (1.15, 1.41) * |

Note: Binary logistic regression models were applied. Models were age, gender, race, research cycle, education level, smoking status, PIR, and physical activity. \*  $P < 0.05$ .

Model 1: Urinary metals modeled without correcting for urinary dilution.

Model 2: Urinary metal concentrations were covariate-adjusted, creatinine-standardized, and ln transformed, binary logistic regressions accounting for NHANES complex survey design.



**Supplementary Table 7.** Posterior inclusion probabilities (PIPs) for inclusion each metal into MAFLD, NAFLD, and MAFLD components models, using Bayesian kernel machine regression (BKMR) model.

| Metal | MAFLD | NAFLD | Diabetes mellitus | Obesity/Overweight | Metabolic dysfunction | High CRP | Central obesity | Prediabetes | Insulin resistance | Low HDL | Hypertension | High TG |
|-------|-------|-------|-------------------|--------------------|-----------------------|----------|-----------------|-------------|--------------------|---------|--------------|---------|
| As    | 0.88  | 0.85  | 0.21              | 0.78               | 0.77                  | 0.97     | 0.48            | 0.06        | 0.50               | 0.72    | 0.00         | 0.65    |
| Asb   | 0.75  | 0.92  | 0.01              | 0.90               | 0.68                  | 0.95     | 0.54            | 0.03        | 0.27               | 0.30    | 0.00         | 0.52    |
| Ba    | 1.00  | 1.00  | 0.99              | 1.00               | 1.00                  | 1.00     | 0.93            | 0.74        | 1.00               | 0.76    | 0.23         | 1.00    |
| Cd    | 1.00  | 1.00  | 0.20              | 1.00               | 1.00                  | 1.00     | 1.00            | 1.00        | 0.83               | 1.00    | 0.06         | 0.87    |
| Co    | 0.74  | 0.84  | 0.05              | 0.83               | 0.81                  | 1.00     | 0.67            | 0.15        | 0.54               | 0.71    | 0.09         | 0.89    |
| Cs    | 0.95  | 0.99  | 0.99              | 1.00               | 0.96                  | 1.00     | 1.00            | 0.16        | 0.69               | 0.64    | 0.07         | 0.91    |
| DMA   | 0.94  | 0.88  | 0.27              | 0.93               | 0.81                  | 0.86     | 0.94            | 0.06        | 0.82               | 0.76    | 0.05         | 0.86    |
| Hg    | 1.00  | 1.00  | 0.50              | 0.32               | 0.99                  | 0.99     | 0.89            | 0.08        | 1.00               | 0.93    | 0.14         | 0.84    |
| Mo    | 1.00  | 1.00  | 1.00              | 1.00               | 0.89                  | 0.72     | 1.00            | 0.13        | 1.00               | 0.91    | 0.03         | 0.93    |
| Pb    | 1.00  | 0.99  | 1.00              | 0.99               | 0.89                  | 1.00     | 1.00            | 0.18        | 1.00               | 0.99    | 0.06         | 0.93    |
| Sb    | 0.67  | 0.84  | 1.00              | 0.76               | 0.70                  | 0.99     | 0.47            | 0.08        | 0.61               | 0.54    | 0.32         | 0.86    |
| Tl    | 1.00  | 1.00  | 0.28              | 1.00               | 0.95                  | 1.00     | 0.90            | 0.41        | 1.00               | 0.65    | 0.23         | 0.90    |
| W     | 1.00  | 1.00  | 1.00              | 0.86               | 0.99                  | 1.00     | 0.98            | 0.13        | 0.98               | 0.99    | 0.52         | 0.97    |

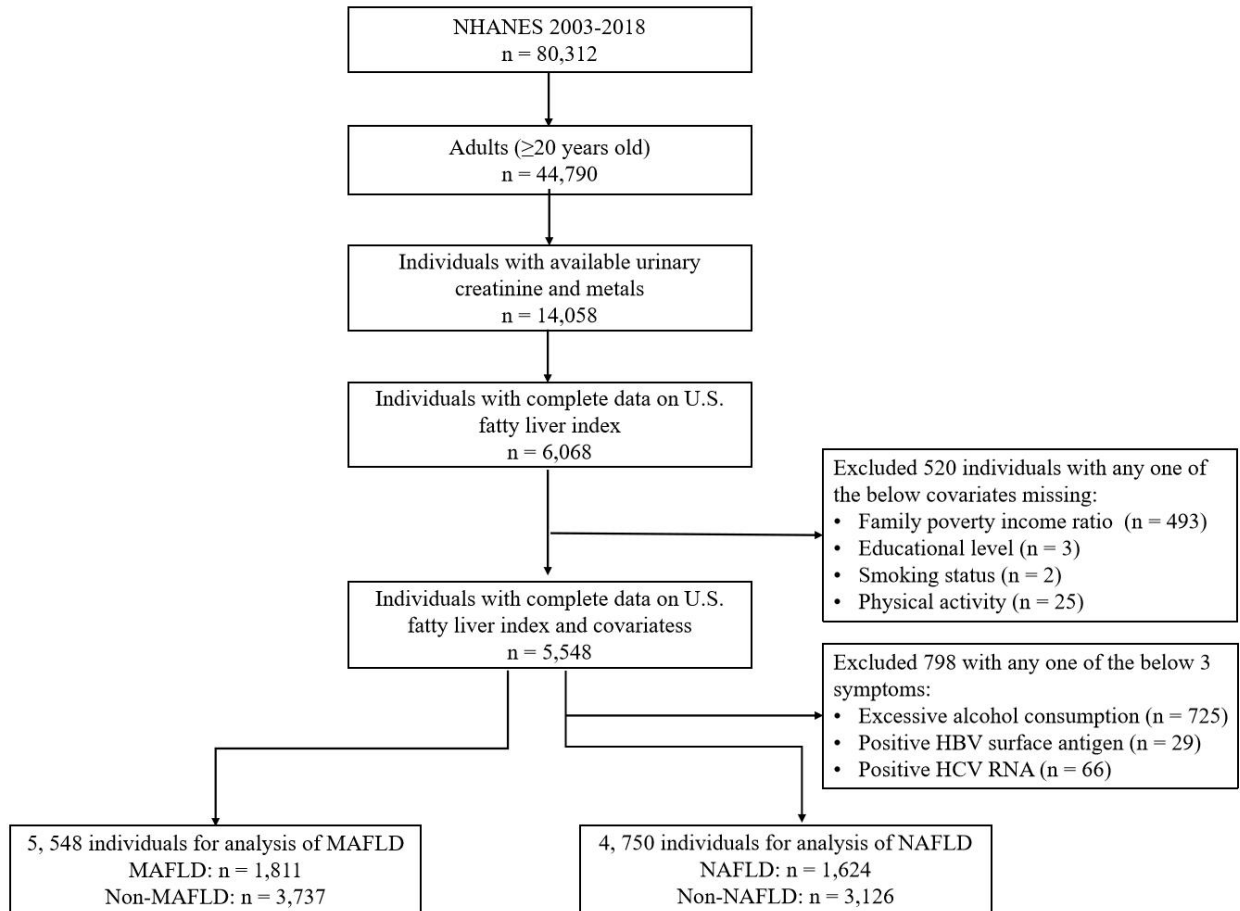

**Supplementary Figure 1.** The flow chart of inclusion and exclusion criteria based on the NHANES 2003-2018

**Spearman Correlation (n=5548)**
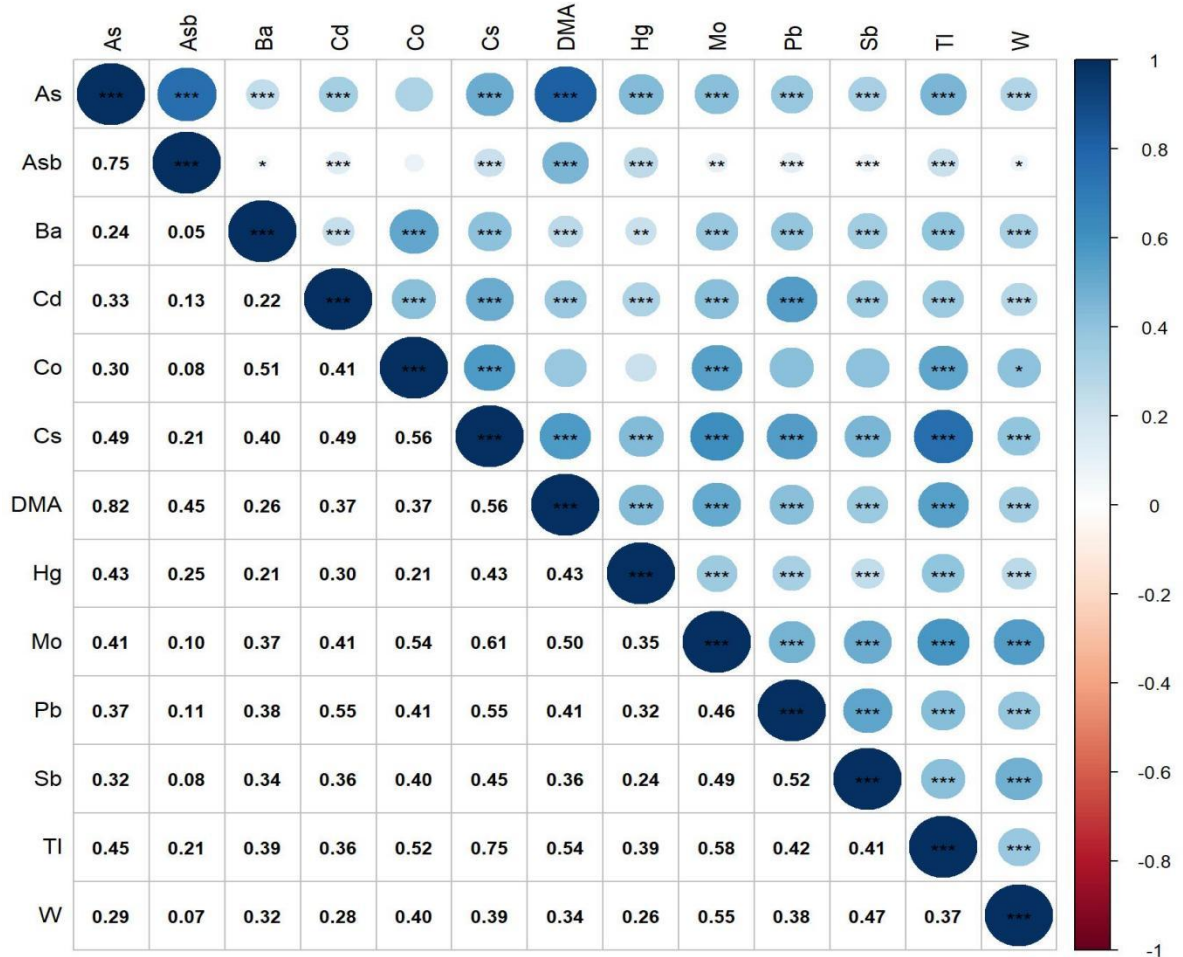

**Supplementary Figure 2.** Spearman correlations of urinary metal levels among adults in NHANES 2003-2018 (n = 5548). \* $P < 0.05$ ; \*\* $P < 0.01$ ; \*\*\* $P < 0.001$ .

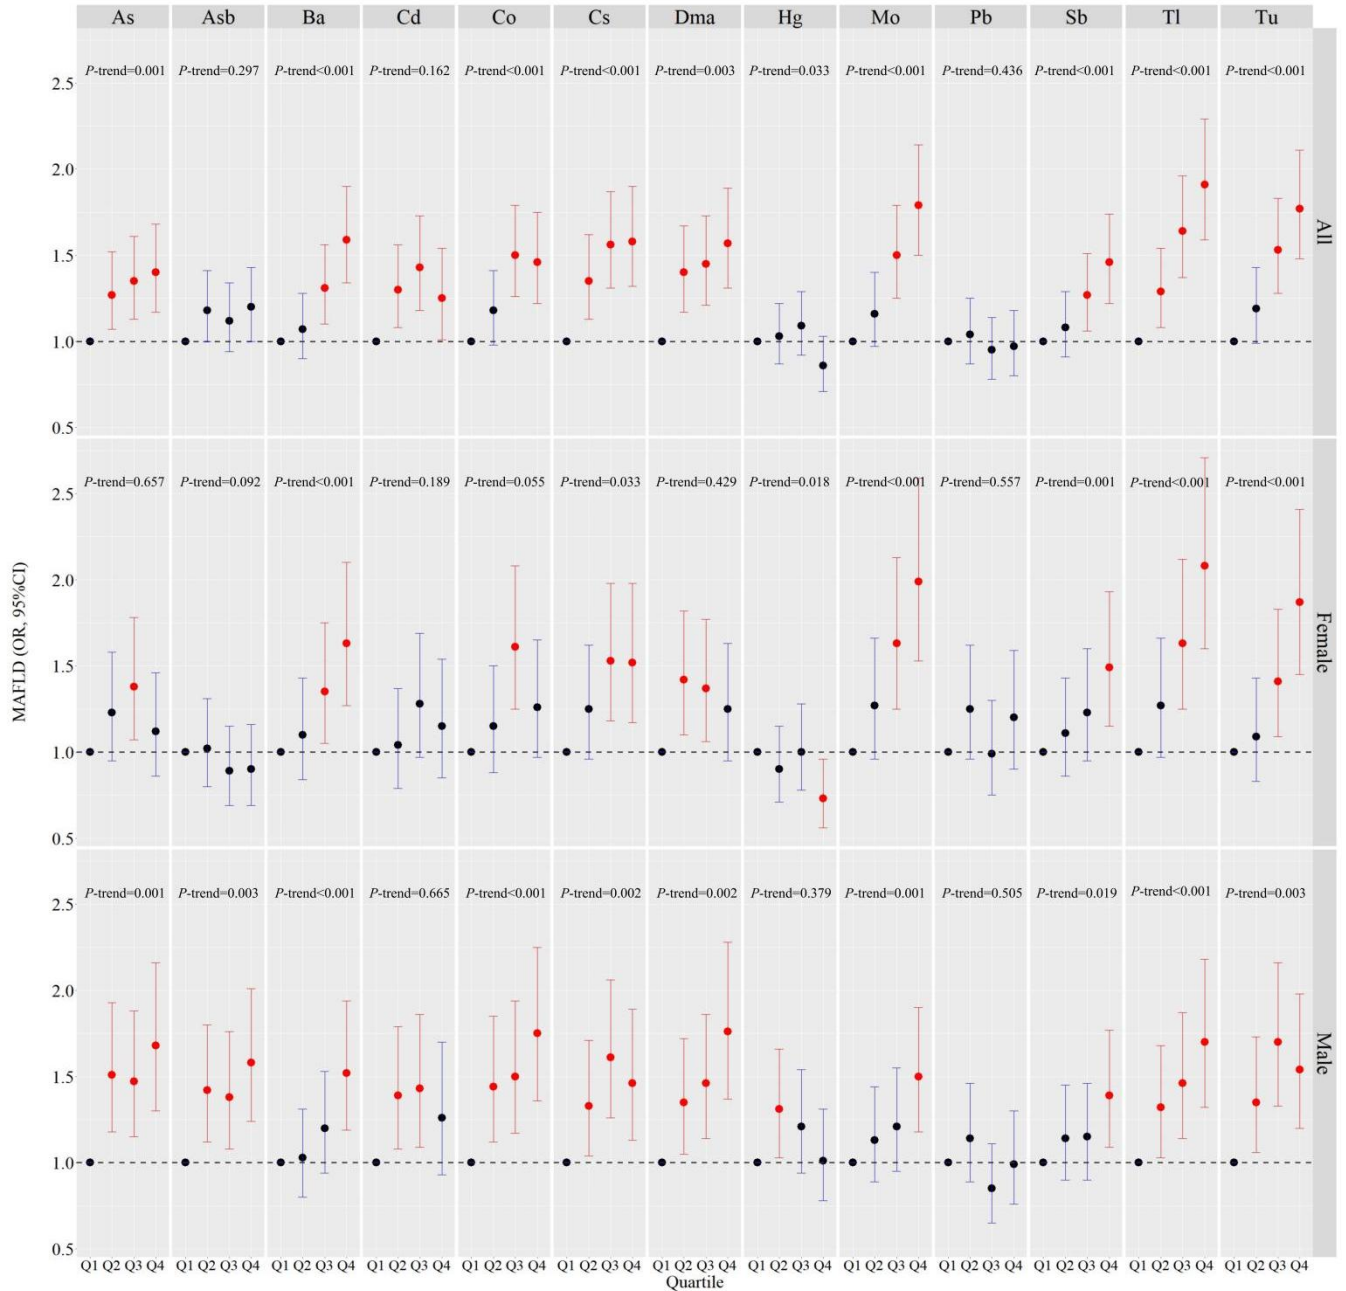

**Supplementary Figure 3.** Associations of urinary metal levels with MAFLD in adults. Binary logistic regression models were applied. Models were adjusted for age, gender, race, research cycle, education level, smoking status, PIR, and physical activity. Q1 to Q4 refers to the 1<sup>st</sup> to 4<sup>th</sup> quartiles of metals. The red point refers to  $P < 0.05$ .

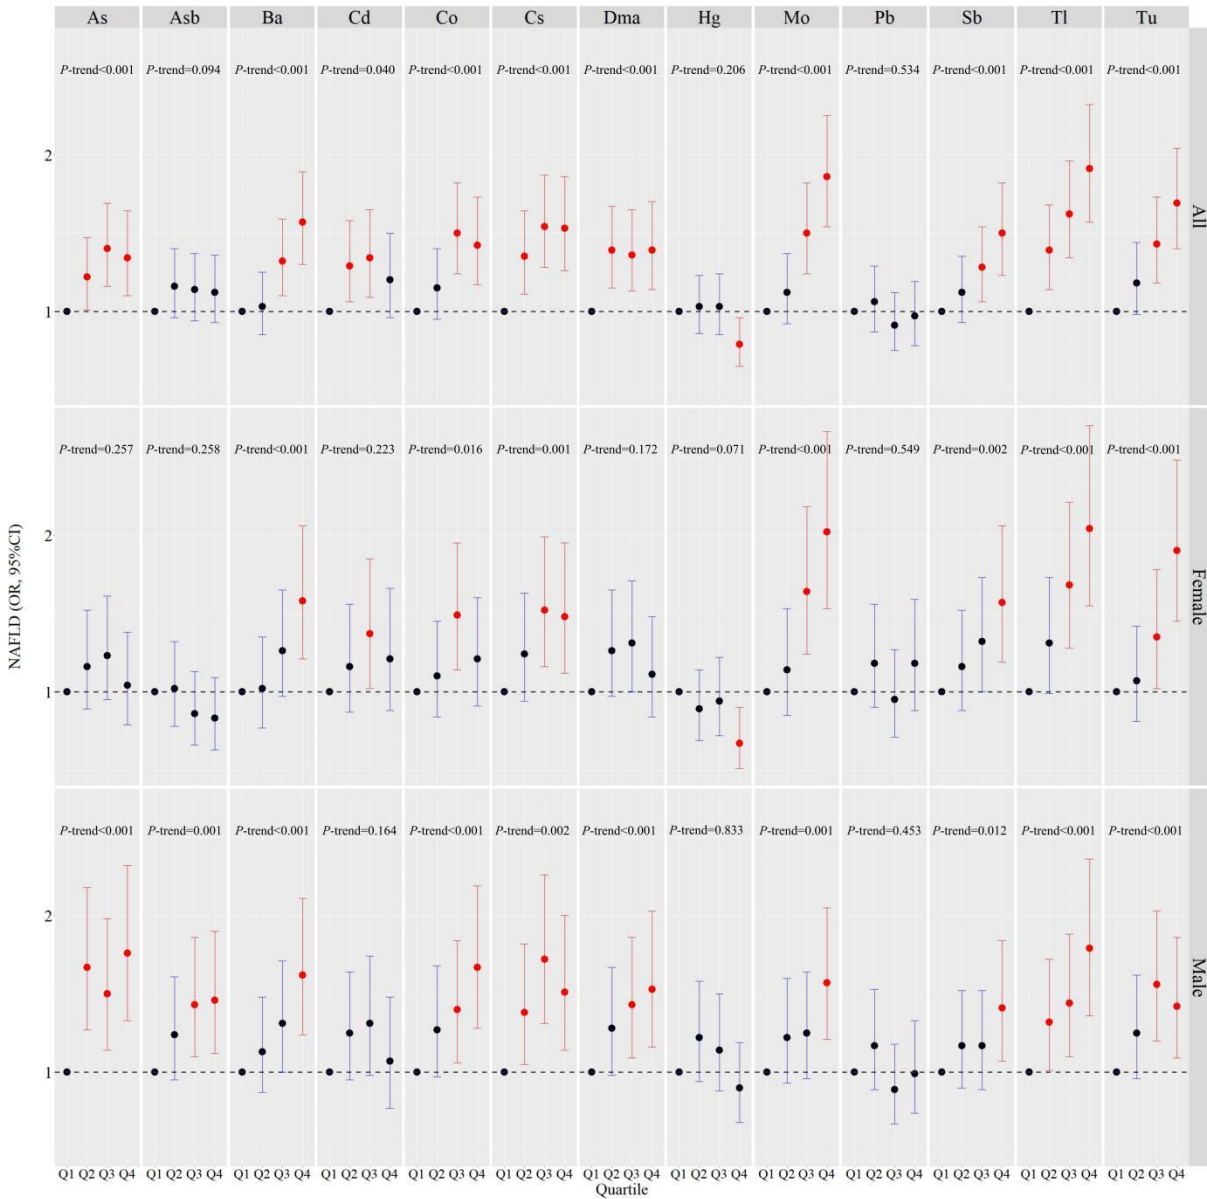

**Supplementary Figure 4.** Associations of urinary metal levels with NAFLD in adults. Binary logistic regression models were applied. Models were adjusted for age, gender, race, research cycle, education level, smoking status, PIR, and physical activity (only for all participants), smoking status, and physical activity. Q1 to Q4 refers to the 1<sup>st</sup> to 4<sup>th</sup> quartiles of metals. The red point refers to  $P < 0.05$ .

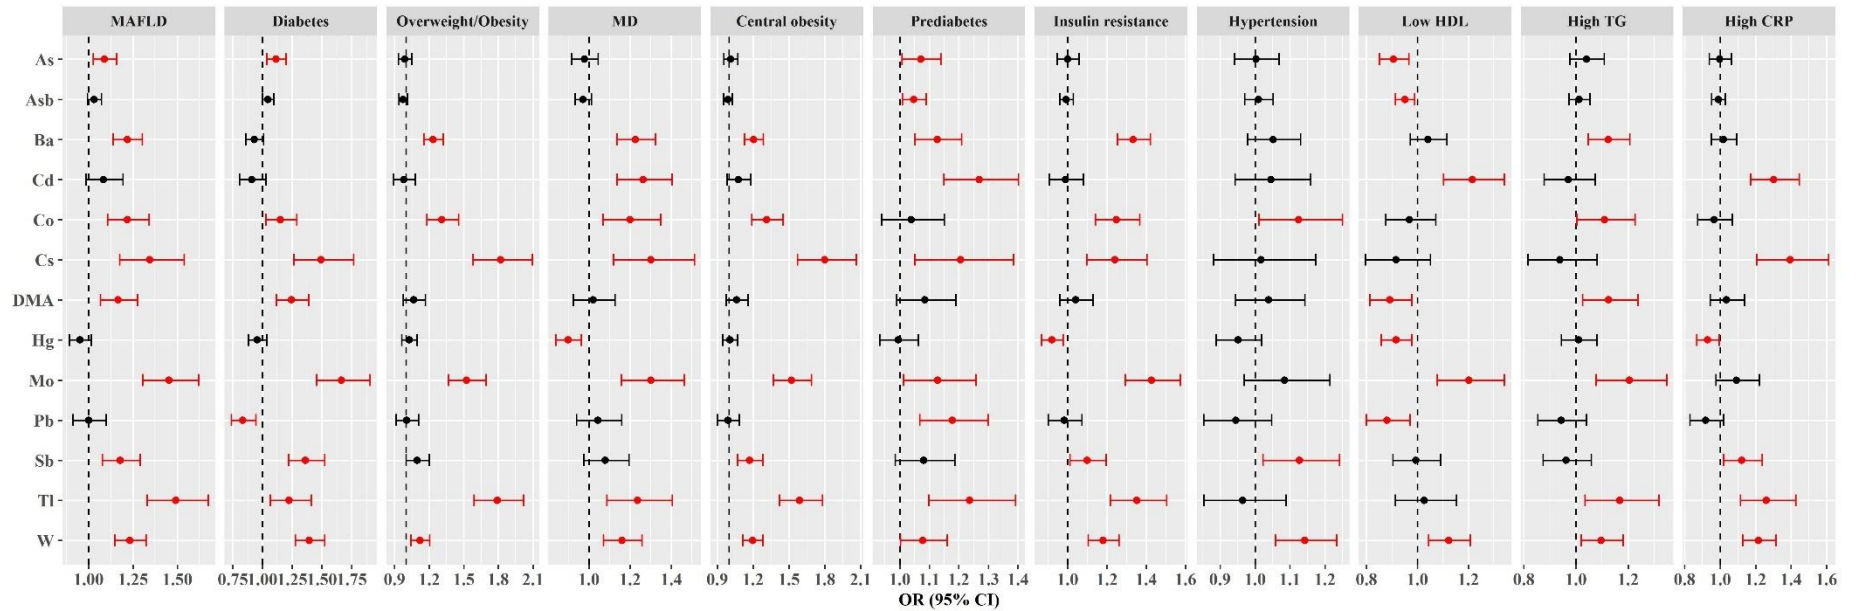

**Supplementary Figure 5.** Associations of urinary metals with MAFLD and its components in adults. Estimates were derived from binary Logistic regression models while adjusting for age, gender, race, research cycle, education level, smoking status, PIR, and physical activity. The red point refers to results with  $P < 0.05$

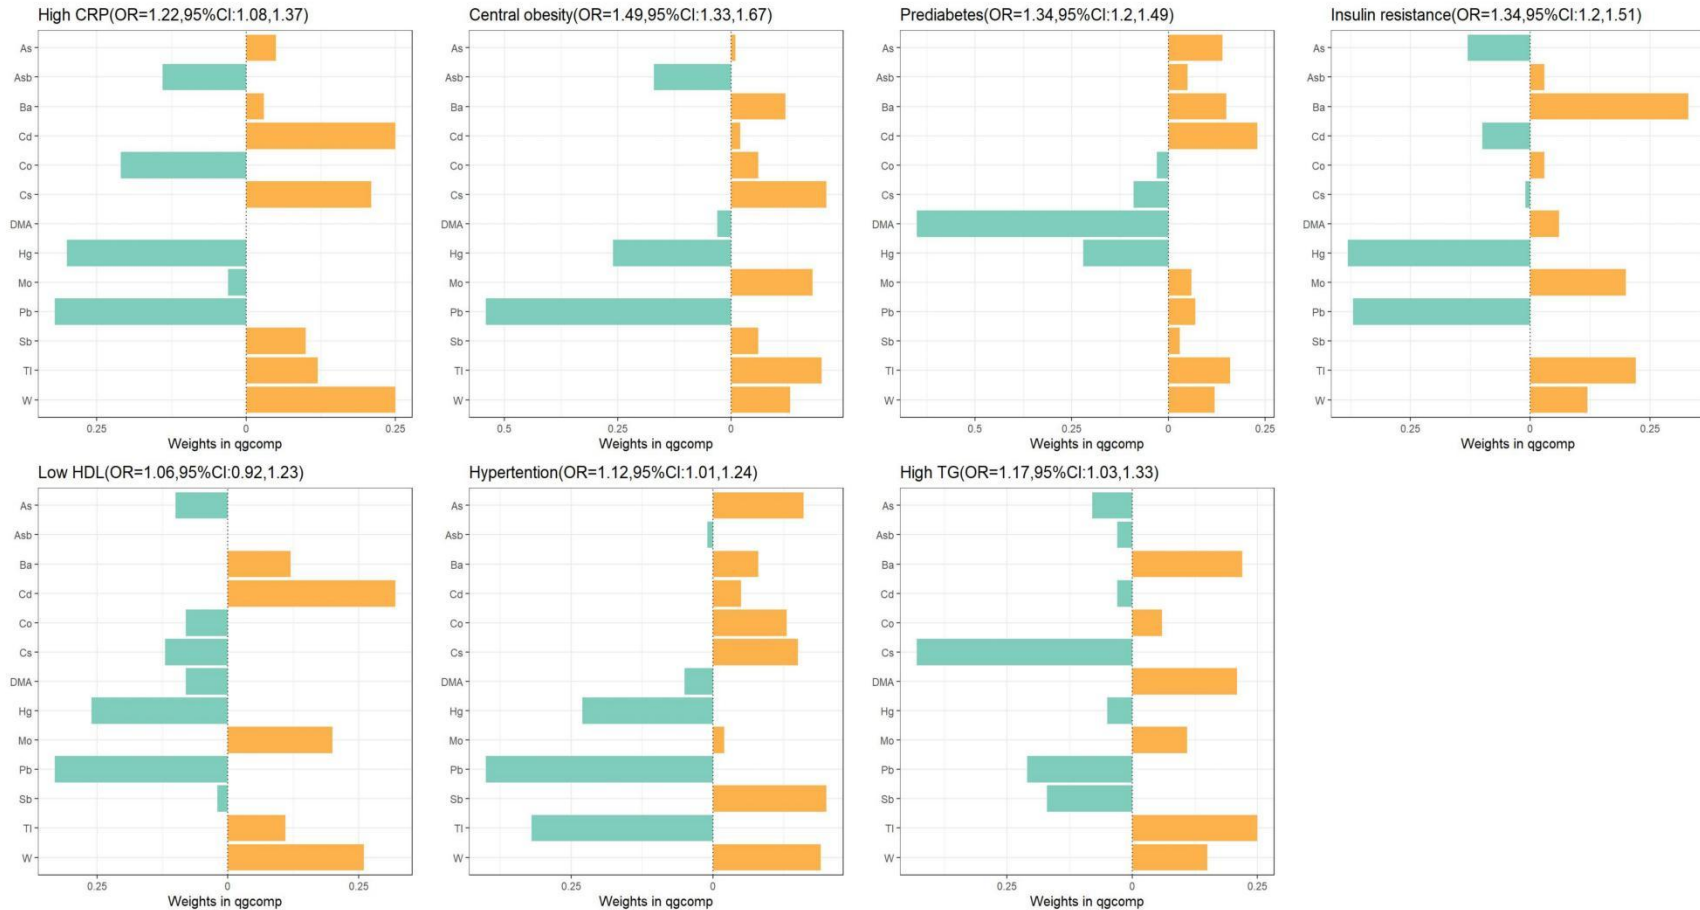

**Supplementary Figure 6.** Combined association (95%CI) and qqcomp weights of metal mixture with metabolic dysfunction by QGC. Models were adjusted for age, gender, race, research cycle, education level, smoking status, poverty income ratio, and physical activity. Qgcomp, quantile g-computation; CRP, C-reactive protein; HDL, high-density lipoprotein; TG, triglyceride.

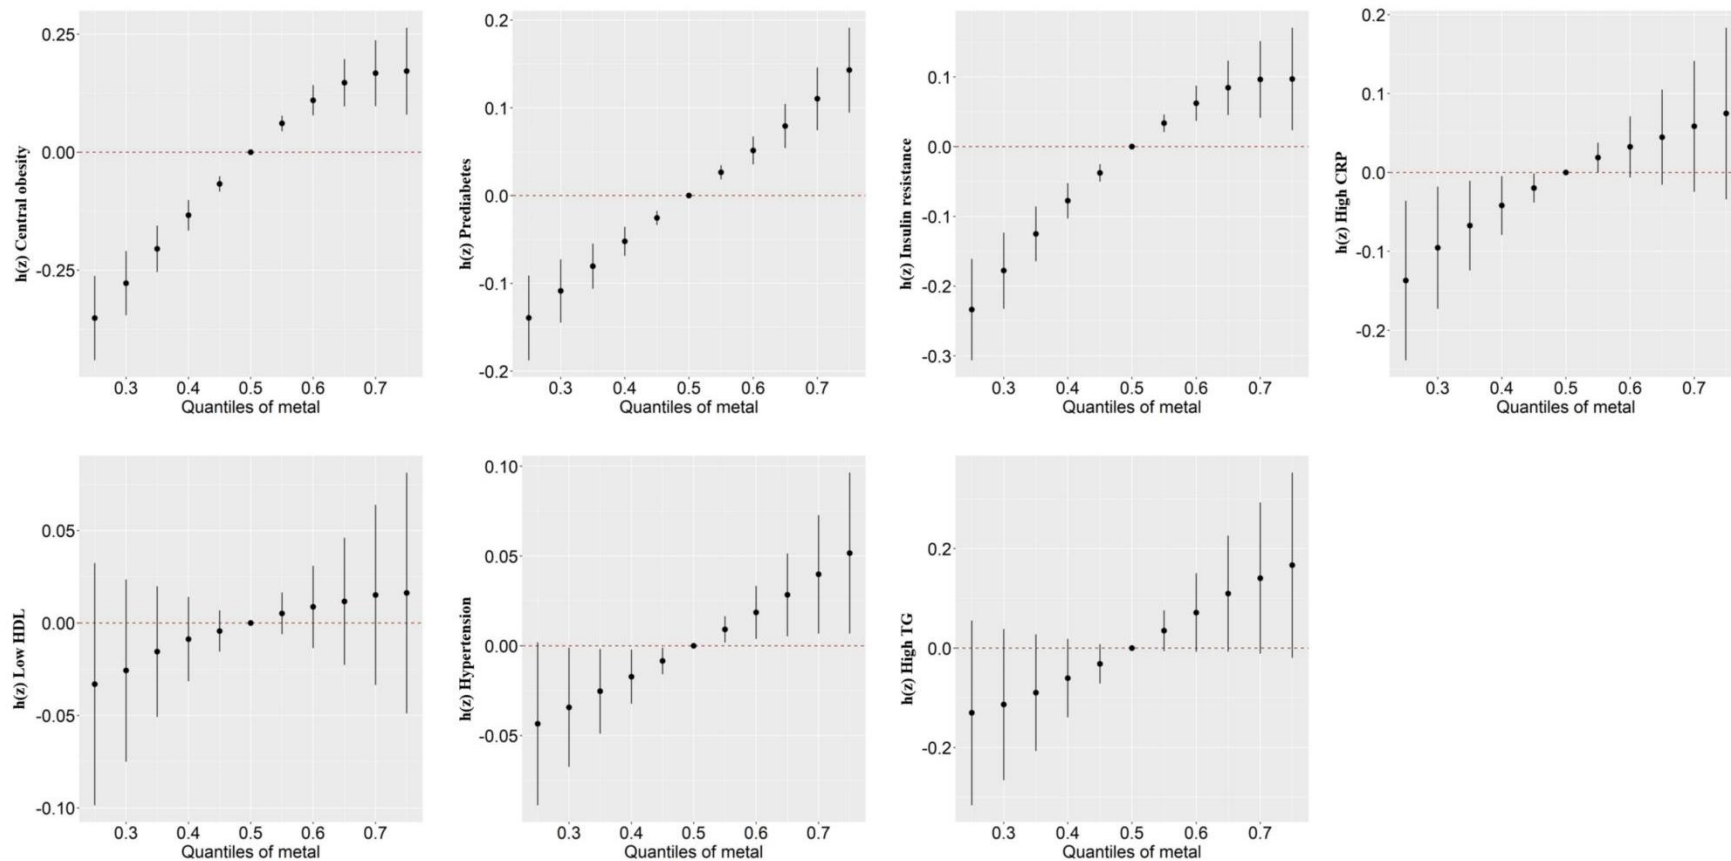

**Supplementary Figure 7.** Combined association (95%CI) of metal mixture with metabolic dysfunction by BKMR models, comparing all chemicals set at different levels with their 50th percentiles. Models were adjusted for age, gender, race, research cycle, education level, smoking status, poverty income ratio, and physical activity. BKMR, Bayesian kernel machine regression; CRP, C-reactive protein; HDL, high-density lipoprotein; TG, triglyceride.



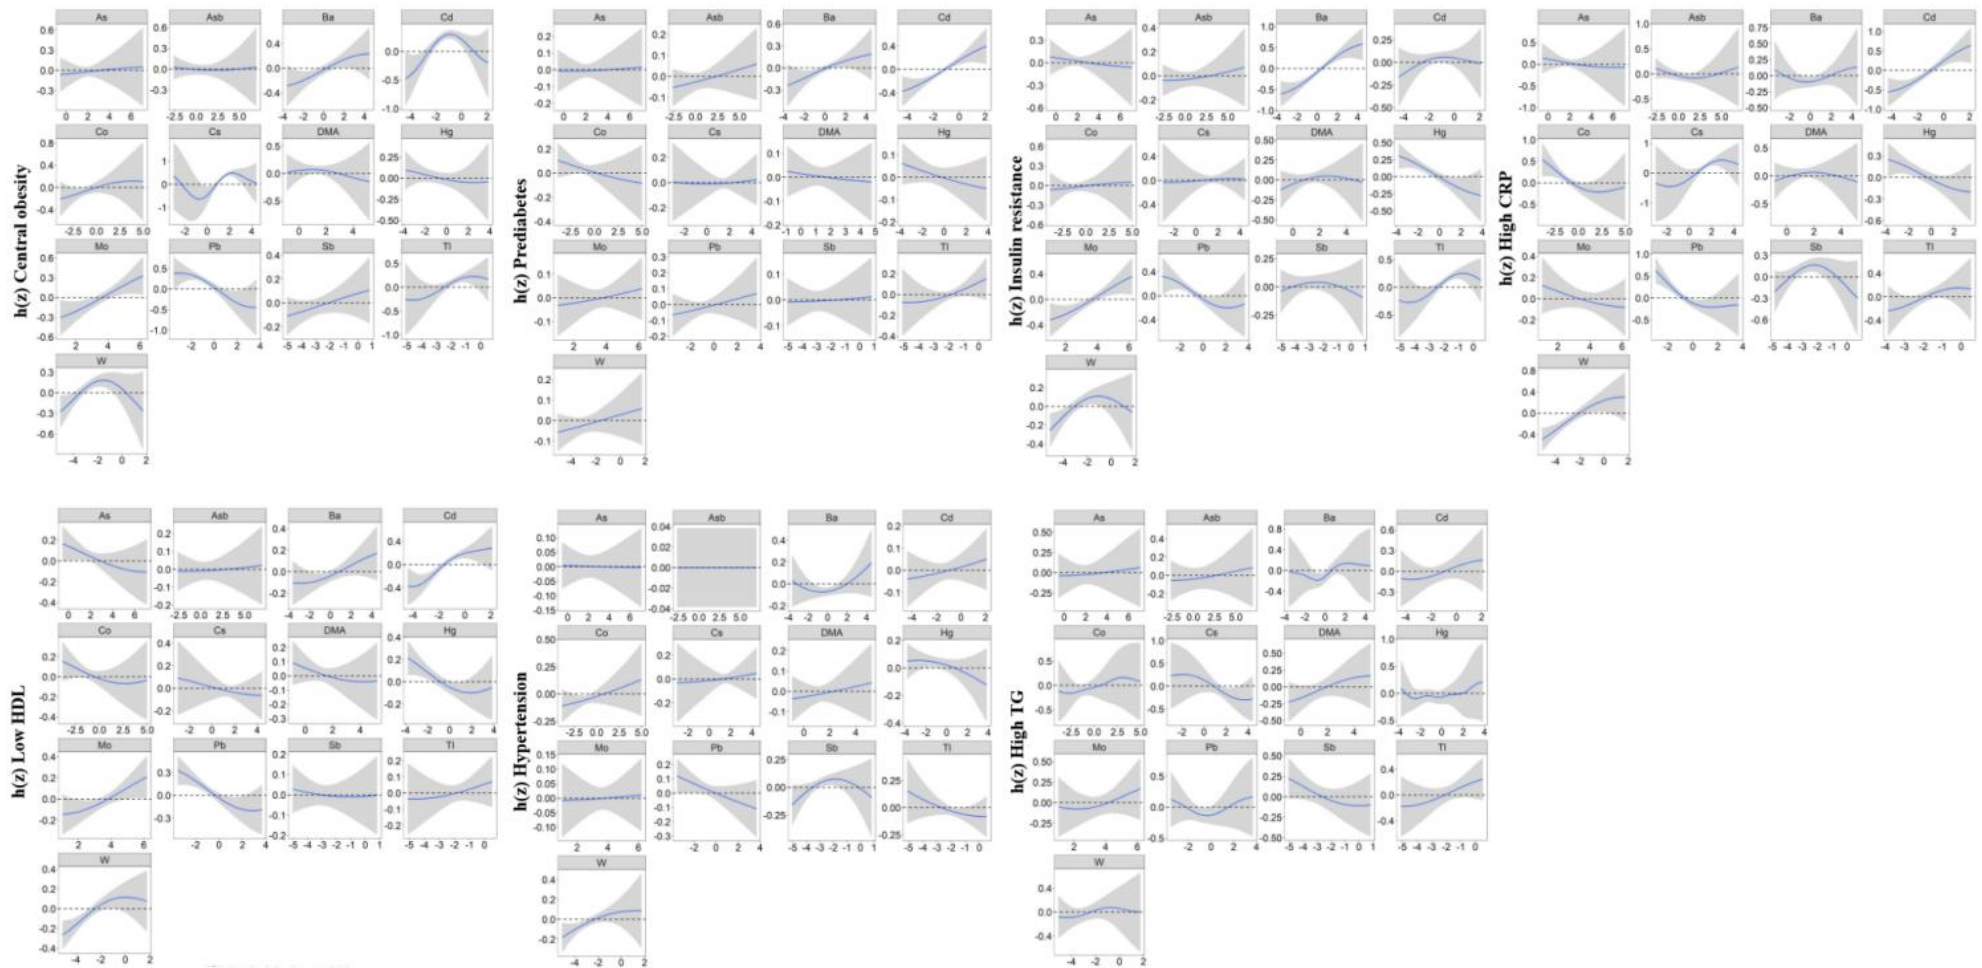

**Supplementary Figure 8.** Univariate exposure-response function (95%CI) showed associations between heavy metals and MAFLD components. All the remaining metal exposures are fixed at their median values. Results were adjusted for age, gender, race, research cycle, education level, smoking status, poverty income ratio, and physical activity. Note: BKMR, Bayesian kernel machine regression; CRP, C-reactive protein; HDL, high-density lipoprotein; TG, triglyceride.
